# Supplementary figures and images for: Association of the low-carbohydrate dietary pattern with postpartum weight retention in women
Source: Royal Society of Chemistry journal article supplement (doi:10.1039/d1fo00935d), 2021-01-01

**On-line Supplementary Material:** *The process of enrolling and selecting participants.*

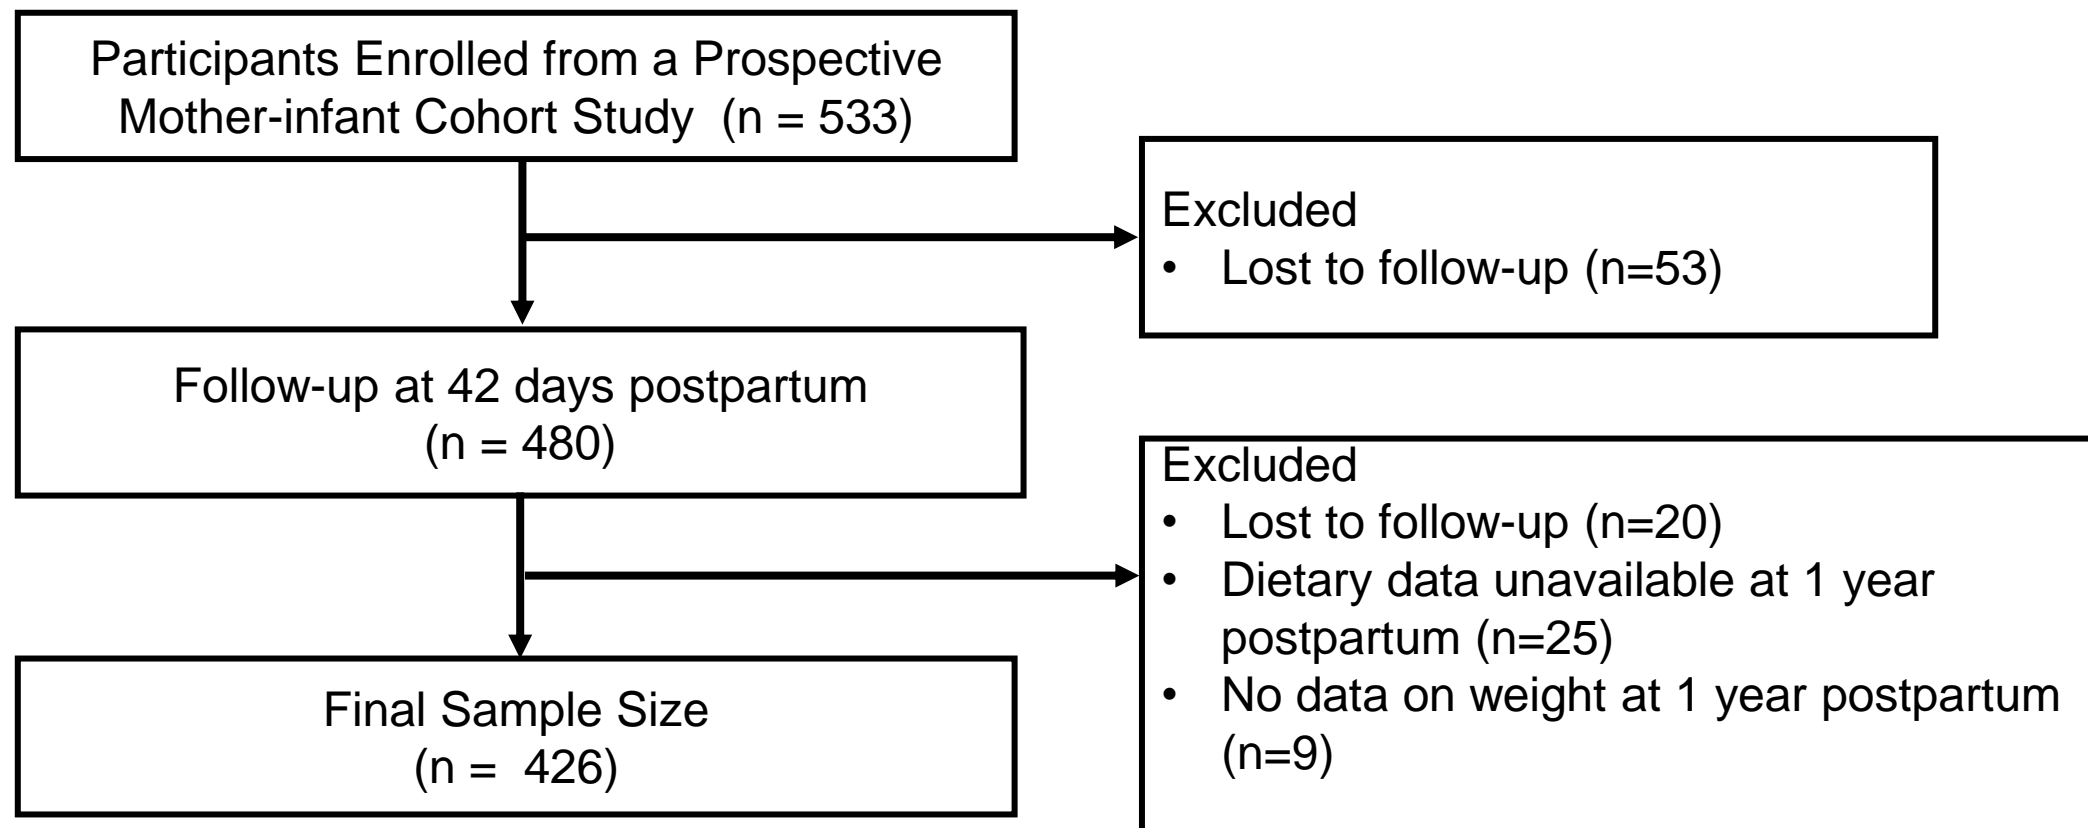

Supplement: d1fo00935d1.pdf [file d1fo00935d1.pdf]
